# Supplementary material
Source: bioRxiv or medRxiv preprint supplement (https://www.biorxiv.org/highwire/filestream/27111/field_highwire_adjunct_files/1/095851-2.pdf)
Supplement: Supplementary file [file 095851-2.pdf]

# Appendix S6: Worked examples for “The coefficient of determination $R^2$ and intra-class correlation ICC from generalized linear-mixed effects models revised and expanded”

*Shinichi Nakagawa*  
*University of New South Wales, Sydney, Australia*  
*Holger Schielzeth*  
*Friedrich Schiller University Jena, Germany*

*19 December 2016*

## Contents

|                                                                                         |          |
|-----------------------------------------------------------------------------------------|----------|
| <b>Data generation: revisting the beetles</b>                                           | <b>2</b> |
| Predictor variables . . . . .                                                           | 2        |
| Response variables . . . . .                                                            | 2        |
| (i) Fecundity: the number of eggs per female . . . . .                                  | 2        |
| (ii) Parasite: the number of endoparasite per individual . . . . .                      | 3        |
| (iii) Size: the body length (in mm) per individual . . . . .                            | 3        |
| (iv) Exploraton: the time taken visiting five sectors (in sec) per individual . . . . . | 3        |
| (v) Morph: Colour morph per male . . . . .                                              | 4        |
| <b>Analysis</b>                                                                         | <b>5</b> |
| Preparation . . . . .                                                                   | 5        |
| (1) Fecudity models: Quasi-Poisson GLMMs with log link . . . . .                        | 5        |
| (1.1) <code>glmmabmb</code> fecundity models . . . . .                                  | 5        |
| (1.2) <code>glmmPQL</code> fecundity models . . . . .                                   | 7        |
| (2) Parasite models: Negative binomial GLMMs with log link . . . . .                    | 10       |
| (2.1) <code>glmmabmb</code> parasite models . . . . .                                   | 10       |
| (2.2) <code>glmer.nb</code> parasite models . . . . .                                   | 12       |
| (3) Size models: Gamma GLMMs with log link . . . . .                                    | 15       |
| (3.1) <code>glmmabmb</code> size models . . . . .                                       | 15       |
| (3.2) <code>glmmPQL</code> size models . . . . .                                        | 17       |
| (3.3) <code>glmer</code> size models . . . . .                                          | 20       |
| (4) Exploration models: Gamma GLMMs with log link . . . . .                             | 22       |
| (4.1) <code>glmmabmb</code> exploration models . . . . .                                | 22       |
| (4.2) <code>glmPQL</code> exploration models . . . . .                                  | 24       |

|                                                                                            |           |
|--------------------------------------------------------------------------------------------|-----------|
| (4.3) glmer exploration models . . . . .                                                   | 27        |
| (5) Morph models: Binomial (binary) GLMMs with logit link . . . . .                        | 29        |
| (5.1) glmmabmb morph models . . . . .                                                      | 30        |
| (5.2) glmer morph models . . . . .                                                         | 32        |
| (6) <i>Extra</i> parasite models: Tweedie (Compound Poisson) GLMMs with log link . . . . . | 34        |
| (6.1) cpglmm parasite models . . . . .                                                     | 35        |
| <b>This is the end (Thank you)</b>                                                         | <b>37</b> |

## Data generation: revisting the beetles

### Predictor variables

First, we start generating a data frame with all design variables.

```
# 12 different populations n = 960
Population <- gl(12, 80, 960)
# 120 containers (8 individuals in each container)
Container <- gl(120, 8, 960)
# Sex of the individuals. Uni-sex within each container (individuals are
# sorted at the pupa stage)
Sex <- factor(rep(rep(c("Female", "Male"), each = 8), 60))
# Habitat at the collection site: dry or wet soil (four individual from each
# Habitat in each container)
Habitat <- factor(rep(rep(c("Dry", "Wet"), each = 4), 120))
# Food treatment at the larval stage: special food ('Exp') or standard food
# ('Cont')
Treatment <- factor(rep(c("Cont", "Exp"), 480))
# Data combined in a data frame
Data <- data.frame(Population = Population, Container = Container, Sex = Sex,
  Habitat = Habitat, Treatment = Treatment)
```

### Response variables

#### (i) Fecundity: the number of eggs per female

```
# Subset the design matrix (only females lay eggs)
DataFemale <- Data[Data$Sex == "Female", ]
# set seed for reproducibility (this will enable one to get the same data
# every time)
set.seed(777)
# simulation of the underlying random effects (Population and Container with
# variance of 0.4 and 0.05, respectively)
PopulationE <- rnorm(12, 0, sqrt(0.4))
ContainerE <- rnorm(120, 0, sqrt(0.05))
# generation of response values on latent scale (!) based on fixed effects,
# random effects and residual errors
```

```

EggL <- with(DataFemale, 1.1 + 0.5 * (as.numeric(Treatment) - 1) + 0.1 * (as.numeric(Habitat) -
1) + PopulationE[Population] + ContainerE[Container] + rnorm(480, 0, sqrt(0.1)))
# data generation (on data scale!) based on Poisson distribution
DataFemale$Egg <- rpois(length(EggL), exp(EggL))
# looking at the data frame
str(DataFemale)

```

```

## 'data.frame': 480 obs. of 6 variables:
## $ Population: Factor w/ 12 levels "1","2","3","4",...: 1 1 1 1 1 1 1 1 1 1 ...
## $ Container : Factor w/ 120 levels "1","2","3","4",...: 1 1 1 1 1 1 1 1 1 3 3 ...
## $ Sex : Factor w/ 2 levels "Female","Male": 1 1 1 1 1 1 1 1 1 1 ...
## $ Habitat : Factor w/ 2 levels "Dry","Wet": 1 1 1 1 2 2 2 2 1 1 ...
## $ Treatment : Factor w/ 2 levels "Cont","Exp": 1 2 1 2 1 2 1 2 1 2 ...
## $ Egg : int 4 5 3 0 4 11 13 3 7 18 ...

```

## (ii) Parasite: the number of endoparasite per individual

```

# Data frame for both sex
DataAll <- Data
# simulation of the underlying random effects (Population and Container with
# variance of 0.5 and 0.8, respectively)
PopulationE <- rnorm(12, 0, sqrt(0.5))
ContainerE <- rnorm(120, 0, sqrt(0.8))
# generation of response values on latent scale (!) based on fixed effects
# and random effects
ParasiteL <- with(DataAll, 1.8 + 2 * (-1) * (as.numeric(Sex) - 1) + 0.8 * (-1) *
(as.numeric(Treatment) - 1) + 0.7 * (as.numeric(Habitat) - 1) + PopulationE[Population] +
ContainerE[Container])
# data generation (on data scale!) based on negative binomial distributions;
# size = theta
DataAll$Parasite <- rnbinom(length(ParasiteL), size = 5, mu = exp(ParasiteL))

```

## (iii) Size: the body length (in mm) per individual

```

# simulation of the underlying random effects (Population and Container with
# variance of 1.3 and 0.3, respectively)
PopulationE <- rnorm(12, 0, sqrt(1.3))
ContainerE <- rnorm(120, 0, sqrt(0.3))
# data generation based on fixed effects, random effects and random
# residuals errors
DataAll$BodyL <- 15 + 3 * (-1) * (as.numeric(Sex) - 1) + 0.4 * (as.numeric(Treatment) -
1) + 0.15 * (as.numeric(Habitat) - 1) + PopulationE[Population] + ContainerE[Container] +
rnorm(960, 0, sqrt(1.2))

```

## (iv) Exploraton: the time taken visiting five sectors (in sec) per individual

```

# simulation of the underlying random effects (Population and Container with
# variance of 0.2 and 0.2, respectively)
PopulationE <- rnorm(12, 0, sqrt(0.2))
ContainerE <- rnorm(120, 0, sqrt(0.2))
# generation of response values on latent scale (!) based on fixed effects
# and random effects
ExplorationL <- with(DataAll, 4 + 1 * (-1) * (as.numeric(Sex) - 1) + 2 * (as.numeric(Treatment) -
1) + 0.5 * (-1) * (as.numeric(Habitat) - 1) + PopulationE[Population] +
ContainerE[Container])
# data generation (on data scale!) based on gamma distribution; size = theta
DataAll$Exploration <- rgamma(length(ExplorationL), shape = exp(ExplorationL) *
0.3, rate = 0.3)
# looking at the data ferme
str(DataAll)

```

```

## 'data.frame': 960 obs. of 8 variables:
## $ Population : Factor w/ 12 levels "1","2","3","4",...: 1 1 1 1 1 1 1 1 1 1 ...
## $ Container : Factor w/ 120 levels "1","2","3","4",...: 1 1 1 1 1 1 1 1 2 2 ...
## $ Sex : Factor w/ 2 levels "Female","Male": 1 1 1 1 1 1 1 1 2 2 ...
## $ Habitat : Factor w/ 2 levels "Dry","Wet": 1 1 1 1 2 2 2 2 1 1 ...
## $ Treatment : Factor w/ 2 levels "Cont","Exp": 1 2 1 2 1 2 1 2 1 2 ...
## $ Parasite : num 5 2 5 3 10 8 4 4 0 0 ...
## $ BodyL : num 17.3 16.9 15.4 16.1 14.3 ...
## $ Exploration: num 80.7 350.8 32.2 397.1 33.9 ...

```

#### (v) Morph: Colour morph per male

```

# Subset the design matrix (only males express colour morphs)
DataMale <- subset(Data, Sex == "Male")
# simulation of the underlying random effects (Population and Container with
# variance of 1.2 and 0.2, respectively)
PopulationE <- rnorm(12, 0, sqrt(1.2))
ContainerE <- rnorm(120, 0, sqrt(0.2))
# generation of response values on latent scale (!) based on fixed effects
# and random effects
ColourL <- with(DataMale, 0.8 * (-1) + 0.8 * (as.numeric(Treatment) - 1) + 0.5 *
(as.numeric(Habitat) - 1) + PopulationE[Population] + ContainerE[Container])
# data generation (on data scale!) based on binomial distribution
DataMale$Colour <- rbinom(length(ColourL), 1, plogis(ColourL))
# looking at the data ferme
str(DataMale)

```

```

## 'data.frame': 480 obs. of 6 variables:
## $ Population: Factor w/ 12 levels "1","2","3","4",...: 1 1 1 1 1 1 1 1 1 1 ...
## $ Container : Factor w/ 120 levels "1","2","3","4",...: 2 2 2 2 2 2 2 2 4 4 ...
## $ Sex : Factor w/ 2 levels "Female","Male": 2 2 2 2 2 2 2 2 2 2 ...
## $ Habitat : Factor w/ 2 levels "Dry","Wet": 1 1 1 1 2 2 2 2 1 1 ...
## $ Treatment : Factor w/ 2 levels "Cont","Exp": 1 2 1 2 1 2 1 2 1 2 ...
## $ Colour : int 0 0 0 0 0 0 0 0 1 0 0 ...

```

# Analysis

## Preparation

We will use the four functions `glmmadmb`, `glmer` (`glmer.nb`), `glmmPQL` and `cpglmm` from the three R packages for analysis: `glmmADMB`, `lme4`, `MASS` and `cplm`, respectively. `MASS` should be already installed in the default R environment, but we will need to install the other two.

```
# installing glmmADMB
install.packages("R2admb")
install.packages("glmmADMB", repos = c("http://glmmadmb.r-forge.r-project.org/repos",
  getOption("repos")), type = "source")
# installing lme4
install.packages("lme4")
# installing MASS
install.packages("cplm")
```

We now load the three packages to be ready for analysis.

```
library(glmmADMB)
library(lme4)
library(MASS)
```

In the main text, we only report results from `glmmadmb`, but below, we will use at least two different functions to fit each of five different models below.

### (1) Fecundity models: Quasi-Poisson GLMMs with log link

Below we use two functions: `glmmabmb` and `glmmPQL`. They produce similar results both for regression coefficients (fixed effects) and variance components (random effects).

#### (1.1) `glmmabmb` fecundity models

```
# Fit null model without fixed effects (but including all random effects)
fecmodADMBr <- glmmadmb(Egg ~ 1 + (1 | Population) + (1 | Container), family = "nbinom1",
  data = DataFemale)
# Fit alternative model including fixed and all random effects
fecmodADMBf <- glmmadmb(Egg ~ Treatment + Habitat + (1 | Population) + (1 |
  Container), family = "nbinom1", data = DataFemale)
# View model fits for both models
summary(fecmodADMBr)
```

```
##
## Call:
## glmmadmb(formula = Egg ~ 1 + (1 | Population) + (1 | Container),
##   data = DataFemale, family = "nbinom1")
##
## AIC: 2498.8
##
```

```
## Coefficients:
##           Estimate Std. Error z value Pr(>|z|)
## (Intercept)  1.630      0.128   12.7  <2e-16 ***
## ---
## Signif. codes:  0 '***' 0.001 '**' 0.01 '*' 0.05 '.' 0.1 ' ' 1
##
## Number of observations: total=480, Population=12, Container=60
## Random effect variance(s):
## Group=Population
##           Variance StdDev
## (Intercept)  0.1775 0.4213
## Group=Container
##           Variance StdDev
## (Intercept)  0.04167 0.2041
##
## Negative binomial dispersion parameter: 2.2456 (std. err.: 0.16307)
##
## Log-likelihood: -1245.39
```

```
summary(fecmodADMBf)
```

```
##
## Call:
## glmmadmb(formula = Egg ~ Treatment + Habitat + (1 | Population) +
## (1 | Container), data = DataFemale, family = "nbinom1")
##
## AIC: 2412.3
##
## Coefficients:
##           Estimate Std. Error z value Pr(>|z|)
## (Intercept)  1.2606      0.1384    9.11  <2e-16 ***
## TreatmentExp  0.4912      0.0511    9.61  <2e-16 ***
## HabitatWet    0.1518      0.0496    3.06  0.0022 **
## ---
## Signif. codes:  0 '***' 0.001 '**' 0.01 '*' 0.05 '.' 0.1 ' ' 1
##
## Number of observations: total=480, Population=12, Container=60
## Random effect variance(s):
## Group=Population
##           Variance StdDev
## (Intercept)  0.1873 0.4328
## Group=Container
##           Variance StdDev
## (Intercept)  0.05859 0.2421
##
## Negative binomial dispersion parameter: 1.7228 (std. err.: 0.12423)
##
## Log-likelihood: -1200.17
```

```
# Calculation of the variance in fitted values
VarF <- var(as.vector(model.matrix(fecmodADMBf) %*% fixef(fecmodADMBf)))

# getting the observation-level variance Null model
```

```

omegaN <- fecmodADMBr$alpha # overdispersion omega is alpha in glmmadmb
lambda <- mean(DataFemale$Egg) # for lambda we use the mean of all observations
VarOdN <- omegaN/lambda # the delta method
VarO1N <- log(1 + omegaN/lambda) # log-normal approximation
VarOtN <- trigamma(lambda/omegaN) # trigamma function
# comparing the three
c(VarOdN = VarOdN, VarO1N = VarO1N, VarOtN = VarOtN)

```

```

##      VarOdN      VarO1N      VarOtN
## 0.3909641 0.3299971 0.4770739

```

```

# Full model
omegaF <- fecmodADMBf$alpha # overdispersion omega is alpha in glmmadmb
lambda <- mean(DataFemale$Egg) # for lambda we use the mean of all observations
VarOdF <- omegaF/lambda # the delta method
VarO1F <- log(1 + omegaF/lambda) # log-normal approximation
VarOtF <- trigamma(lambda/omegaF) # trigamma function
# comparing the three
c(VarOdF = VarOdF, VarO1F = VarO1F, VarOtF = VarOtF)

```

```

##      VarOdF      VarO1F      VarOtF
## 0.2999434 0.2623207 0.3493476

```

```

# R2[GLMM(m)] - marginal R2[GLMM]
R2glmmM <- VarF/(VarF + sum(as.numeric(VarCorr(fecmodADMBf)))) + VarOtF)
# R2[GLMM(c)] - conditional R2[GLMM] for full model
R2glmmC <- (VarF + sum(as.numeric(VarCorr(fecmodADMBf))))/(VarF + sum(as.numeric(VarCorr(fecmodADMBf))) +
  VarOtF)
# Raw unadjusted ICC[Population]
ICCrawPop <- VarCorr(fecmodADMBr)$Population[1]/(sum(as.numeric(VarCorr(fecmodADMBr))) +
  VarOtN)
# adjusted ICC[Population]
ICCadjPop <- VarCorr(fecmodADMBf)$Population[1]/(sum(as.numeric(VarCorr(fecmodADMBf))) +
  VarOtF)
# Raw unadjusted ICC[Container]
ICCrawCont <- VarCorr(fecmodADMBr)$Container[1]/(sum(as.numeric(VarCorr(fecmodADMBr))) +
  VarOtN)
# adjusted ICC[Container]
ICCadjCont <- VarCorr(fecmodADMBf)$Container[1]/(sum(as.numeric(VarCorr(fecmodADMBf))) +
  VarOtF)
# comparing the results
c(R2glmmM = R2glmmM, R2glmmC = R2glmmC, ICCrawPop = ICCrawPop, ICCadjPop = ICCadjPop,
  ICCrawCont = ICCrawCont, ICCadjCont = ICCadjCont)

```

```

##      R2glmmM      R2glmmC      ICCrawPop      ICCadjPop      ICCrawCont      ICCadjCont
## 0.10009297 0.47186804 0.25496153 0.31469826 0.05984530 0.09842783

```

## (1.2) glmmPQL fecundity models

```

# Fit null model without fixed effects (but including all random effects)
fecmodPQLr <- glmmPQL(Egg ~ 1, random = list(~1 | Population, ~1 | Container),

```

```

family = "quasipoisson", data = DataFemale)
# Fit alternative model including fixed and all random effects
fecmodPQLf <- glmmPQL(Egg ~ Treatment + Habitat, random = list(~1 | Population,
~1 | Container), family = "quasipoisson", data = DataFemale)
# View model fits for both models
summary(fecmodPQLr)

```

```

## Linear mixed-effects model fit by maximum likelihood
## Data: DataFemale
## AIC BIC logLik
## NA NA NA
##
## Random effects:
## Formula: ~1 | Population
## (Intercept)
## StdDev: 0.4404231
##
## Formula: ~1 | Container %in% Population
## (Intercept) Residual
## StdDev: 0.2394726 1.493101
##
## Variance function:
## Structure: fixed weights
## Formula: ~invwt
## Fixed effects: Egg ~ 1
## Value Std.Error DF t-value p-value
## (Intercept) 1.627181 0.134709 420 12.07923 0
##
## Standardized Within-Group Residuals:
## Min Q1 Med Q3 Max
## -2.0387389 -0.6771608 -0.2089840 0.5151110 5.3924954
##
## Number of Observations: 480
## Number of Groups:
## Population Container %in% Population
## 12 60

```

```
summary(fecmodPQLf)
```

```

## Linear mixed-effects model fit by maximum likelihood
## Data: DataFemale
## AIC BIC logLik
## NA NA NA
##
## Random effects:
## Formula: ~1 | Population
## (Intercept)
## StdDev: 0.4397407
##
## Formula: ~1 | Container %in% Population
## (Intercept) Residual
## StdDev: 0.2555418 1.298306

```



```
##
## Variance function:
## Structure: fixed weights
## Formula: ~invwt
## Fixed effects: Egg ~ Treatment + Habitat
##           Value Std.Error DF t-value p-value
## (Intercept) 1.2500012 0.14078620 418 8.87872 0.0000
## TreatmentExp 0.5199280 0.05128843 418 10.13734 0.0000
## HabitatWet 0.1489874 0.04974055 418 2.99529 0.0029
## Correlation:
##           (Intr) TrtmnE
## TreatmentExp -0.228
## HabitatWet -0.190 0.000
##
## Standardized Within-Group Residuals:
##           Min      Q1      Med      Q3      Max
## -2.1075181 -0.6738357 -0.1211314 0.5105566 4.4290658
##
## Number of Observations: 480
## Number of Groups:
##           Population Container %in% Population
##                   12                   60
```

```
# Calculation of the variance in fitted values
```

```
VarF <- var(as.vector(model.matrix(~Treatment + Habitat, data = DataFemale) %*%
  fixef(fecmodPQLf)))
```

```
# getting the observation-level variance Null model
```

```
omegaN <- as.numeric(VarCorr(fecmodPQLr)[5, 1]) # overdispersion omega is residual variance in glmmPQL
```

```
lambda <- mean(DataFemale$Egg)
```

```
VarOdN <- omegaN/lambda
```

```
VarOlN <- log(1 + omegaN/lambda)
```

```
VarOtN <- trigamma(lambda/omegaN)
```

```
# comparing the three
```

```
c(VarOdN = VarOdN, VarOlN = VarOlN, VarOtN = VarOtN)
```

```
## VarOdN VarOlN VarOtN
```

```
## 0.3881350 0.3279611 0.4729377
```

```
# Full model
```

```
omegaF <- as.numeric(VarCorr(fecmodPQLf)[5, 1]) # overdispersion omega is residual variance in glmmPQL
```

```
VarOdF <- omegaF/lambda
```

```
VarOlF <- log(1 + omegaF/lambda)
```

```
VarOtF <- trigamma(lambda/omegaF)
```

```
# comparing the three
```

```
c(VarOdF = VarOdF, VarOlF = VarOlF, VarOtF = VarOtF)
```

```
## VarOdF VarOlF VarOtF
```

```
## 0.2934667 0.2573259 0.3406718
```

```
# R2[GLMM(m)] - marginal R2[GLMM]
```

```
R2glmmM <- VarF/(VarF + sum(as.numeric(VarCorr(fecmodPQLf)[c(2, 4), 1])) + VarOtF)
```

```

# R2[GLMM(c)] - conditional R2[GLMM] for full model
R2glmmC <- (VarF + sum(as.numeric(VarCorr(fecmodPQLf)[c(2, 4), 1])))/(VarF +
  sum(as.numeric(VarCorr(fecmodPQLf)[c(2, 4), 1])) + VarOtF)
# Raw unadjusted ICC[Population]
ICCrawPop <- as.numeric(VarCorr(fecmodPQLr)[2, 1])/(sum(as.numeric(VarCorr(fecmodPQLr)[c(2,
  4), 1])) + VarOtN)
# adjusted ICC[Population]
ICCadjPop <- as.numeric(VarCorr(fecmodPQLf)[2, 1])/(sum(as.numeric(VarCorr(fecmodPQLf)[c(2,
  4), 1])) + VarOtF)
# Raw unadjusted ICC[Container]
ICCrawCont <- as.numeric(VarCorr(fecmodPQLr)[4, 1])/(sum(as.numeric(VarCorr(fecmodPQLr)[c(2,
  4), 1])) + VarOtN)
# adjusted ICC[Container]
ICCadjCont <- as.numeric(VarCorr(fecmodPQLf)[4, 1])/(sum(as.numeric(VarCorr(fecmodPQLf)[c(2,
  4), 1])) + VarOtF)
# comparing the results
c(R2glmmM = R2glmmM, R2glmmC = R2glmmC, ICCrawPop = ICCrawPop, ICCadjPop = ICCadjPop,
  ICCrawCont = ICCrawCont, ICCadjCont = ICCadjCont)

```

```

##      R2glmmM      R2glmmC  ICCrawPop  ICCadjPop  ICCrawCont  ICCadjCont
## 0.1089506 0.4935217 0.2678227 0.3226386 0.0791806 0.1089549

```

## (2) Parasite models: Negative binomial GLMMs with log link

Below we use two functions: `glmmabmb` and `glmer.nb`. They produce similar results both for regression coefficients (fixed effects) and variance components (random effects).

### (2.1) `glmmabmb` parasite models

```

# Fit null model without fixed effects (but including all random effects)
parmodADMBr <- glmmadmb(Parasite ~ 1 + (1 | Population) + (1 | Container), family = "nbinom2",
  data = DataAll)
# Fit alternative model including fixed and all random effects
parmodADMBf <- glmmadmb(Parasite ~ Sex + Treatment + Habitat + (1 | Population) +
  (1 | Container), family = "nbinom2", data = DataAll)
# View model fits for both models
summary(parmodADMBr)

```

```

##
## Call:
## glmmadmb(formula = Parasite ~ 1 + (1 | Population) + (1 | Container),
##   data = DataAll, family = "nbinom2")
##
## AIC: 4342.6
##
## Coefficients:
##             Estimate Std. Error z value Pr(>|z|)
## (Intercept)   0.766      0.222   3.45 0.00057 ***
## ---
## Signif. codes:  0 '***' 0.001 '**' 0.01 '*' 0.05 '.' 0.1 ' ' 1

```

```
##
## Number of observations: total=960, Population=12, Container=120
## Random effect variance(s):
## Group=Population
##           Variance StdDev
## (Intercept)  0.3745  0.612
## Group=Container
##           Variance StdDev
## (Intercept)  1.976  1.406
##
## Negative binomial dispersion parameter: 1.9848 (std. err.: 0.1725)
##
## Log-likelihood: -2167.31
```

```
summary(parmodADMBf)
```

```
##
## Call:
## glmmadmb(formula = Parasite ~ Sex + Treatment + Habitat + (1 |
##   Population) + (1 | Container), data = DataAll, family = "nbinom2")
##
## AIC: 3920.5
##
## Coefficients:
##           Estimate Std. Error z value Pr(>|z|)
## (Intercept)  1.7524     0.2402   7.29   3e-13 ***
## SexMale      -2.1977     0.1599  -13.75  <2e-16 ***
## TreatmentExp -0.7683     0.0518  -14.82  <2e-16 ***
## HabitatWet   0.7002     0.0516   13.57  <2e-16 ***
## ---
## Signif. codes:  0 '***' 0.001 '**' 0.01 '*' 0.05 '.' 0.1 ' ' 1
##
## Number of observations: total=960, Population=12, Container=120
## Random effect variance(s):
## Group=Population
##           Variance StdDev
## (Intercept)  0.5409 0.7354
## Group=Container
##           Variance StdDev
## (Intercept)  0.6128 0.7828
##
## Negative binomial dispersion parameter: 4.8684 (std. err.: 0.56935)
##
## Log-likelihood: -1953.25
```

```
# Calculation of the variance in fitted values
VarF <- var(as.vector(model.matrix(parmodADMBf) %*% fixef(parmodADMBf)))

# getting the observation-level variance Null model
thetaN <- parmodADMBr$alpha # note that theta is called alpha in glmmadmb
lambda <- mean(DataAll$Parasite)
VarOdN <- 1/lambda + 1/thetaN # the delta method
VarOlN <- log(1 + (1/lambda) + (1/thetaN)) # log-normal approximation
```

```

VarOtN <- trigamma((1/lambda + 1/thetaN)^(-1)) # trigamma function
# comparing the three
c(VarOdN = VarOdN, VarOlN = VarOlN, VarOtN = VarOtN)

```

```

##      VarOdN      VarOlN      VarOtN
## 0.6330176 0.4904296 0.8729216

```

```

# Full model
thetaF <- parmoadMBf$alpha # note that theta is called alpha in glmmadmb
VarOdF <- 1/lambda + 1/thetaF # the delta method
VarOlF <- log(1 + (1/lambda) + (1/thetaF)) # log-normal approximation
VarOtF <- trigamma((1/lambda + 1/thetaF)^(-1)) # trigamma function
# comparing the three
c(VarOdF = VarOdF, VarOlF = VarOlF, VarOtF = VarOtF)

```

```

##      VarOdF      VarOlF      VarOtF
## 0.3345948 0.2886277 0.3966848

```

```

# R2[GLMM(m)] - marginal R2[GLMM]
R2glmmM <- VarF/(VarF + sum(as.numeric(VarCorr(parmoadMBf))) + VarOtF)
# R2[GLMM(c)] - conditional R2[GLMM] for full model
R2glmmC <- (VarF + sum(as.numeric(VarCorr(parmoadMBf))))/(VarF + sum(as.numeric(VarCorr(parmoadMBf))) +
  VarOtF)
# Raw unadjusted ICC[Population]
ICCCrawPop <- VarCorr(parmoadMBr)$Population[1]/(sum(as.numeric(VarCorr(parmoadMBr))) +
  VarOtN)
# adjusted ICC[Population]
ICCCadjPop <- VarCorr(parmoadMBf)$Population[1]/(sum(as.numeric(VarCorr(parmoadMBf))) +
  VarOtF)
# Raw unadjusted ICC[Container]
ICCCrawCont <- VarCorr(parmoadMBr)$Container[1]/(sum(as.numeric(VarCorr(parmoadMBr))) +
  VarOtN)
# adjusted ICC[Container]
ICCCadjCont <- VarCorr(parmoadMBf)$Container[1]/(sum(as.numeric(VarCorr(parmoadMBf))) +
  VarOtF)
# comparing the results
c(R2glmmM = R2glmmM, R2glmmC = R2glmmC, ICCrawPop = ICCrawPop, ICCadjPop = ICCadjPop,
  ICCrawCont = ICCrawCont, ICCadjCont = ICCadjCont)

```

```

##      R2glmmM      R2glmmC      ICCrawPop      ICCadjPop      ICCrawCont      ICCadjCont
## 0.4882517 0.8690587 0.1162018 0.3488601 0.6129797 0.3952695

```

## (2.2) glmer.nb parasite models

```

# Fit null model without fixed effects (but including all random effects)
parmoadGLMERr <- glmer.nb(Parasite ~ 1 + (1 | Population) + (1 | Container),
  data = DataAll)
# Fit alternative model including fixed and all random effects
parmoadGLMERf <- glmer.nb(Parasite ~ Sex + Treatment + Habitat + (1 | Population) +
  (1 | Container), data = DataAll)

```

```
# View model fits for both models
summary(parmodGLMERr)
```

```
## Generalized linear mixed model fit by maximum likelihood (Laplace
## Approximation) [glmerMod]
## Family: Negative Binomial(1.9844) (log)
## Formula: Parasite ~ 1 + (1 | Population) + (1 | Container)
## Data: DataAll
##
##      AIC      BIC   logLik deviance df.resid
##  4342.5   4361.9 -2167.2  4334.5     956
##
## Scaled residuals:
##      Min       1Q   Median       3Q      Max
## -1.3006 -0.6760 -0.3297  0.4313  4.0466
##
## Random effects:
## Groups      Name      Variance Std.Dev.
## Container (Intercept) 1.9734  1.4048
## Population (Intercept) 0.3718  0.6098
## Number of obs: 960, groups: Container, 120; Population, 12
##
## Fixed effects:
##              Estimate Std. Error z value Pr(>|z|)
## (Intercept)   0.7368     0.2217   3.323 0.00089 ***
## ---
## Signif. codes:  0 '***' 0.001 '**' 0.01 '*' 0.05 '.' 0.1 ' ' 1
```

```
summary(parmodGLMERf)
```

```
## Generalized linear mixed model fit by maximum likelihood (Laplace
## Approximation) [glmerMod]
## Family: Negative Binomial(4.8664) (log)
## Formula: Parasite ~ Sex + Treatment + Habitat + (1 | Population) + (1 |
## Container)
## Data: DataAll
##
##      AIC      BIC   logLik deviance df.resid
##  3920.5   3954.5 -1953.2  3906.5     953
##
## Scaled residuals:
##      Min       1Q   Median       3Q      Max
## -1.8116 -0.6497 -0.2998  0.5259  3.3393
##
## Random effects:
## Groups      Name      Variance Std.Dev.
## Container (Intercept) 0.6124  0.7826
## Population (Intercept) 0.5393  0.7344
## Number of obs: 960, groups: Container, 120; Population, 12
##
## Fixed effects:
##              Estimate Std. Error z value Pr(>|z|)
```

```
## (Intercept) 1.74034 0.23993 7.254 4.06e-13 ***
## SexMale -2.19616 0.15978 -13.745 < 2e-16 ***
## TreatmentExp -0.76439 0.05156 -14.825 < 2e-16 ***
## HabitatWet 0.69646 0.05135 13.564 < 2e-16 ***
## ---
## Signif. codes: 0 '***' 0.001 '**' 0.01 '*' 0.05 '.' 0.1 ' ' 1
##
## Correlation of Fixed Effects:
## (Intr) SexMal TrtmnE
## SexMale -0.292
## TreatmntExp -0.088 0.023
## HabitatWet -0.123 -0.021 -0.007
```

```
# Calculation of the variance in fitted values
VarF <- var(as.vector(model.matrix(parmodGLMERf) %*% fixef(parmodGLMERf)))
```

```
# getting the observation-level variance Null model
thetaN <- getME(parmodGLMERr, "glmer.nb.theta")
lambda <- mean(DataAll$Parasite)
VarOdN <- 1/lambda + 1/thetaN # the delta method
VarOlN <- log(1 + (1/lambda) + (1/thetaN)) # log-normal approximation
VarOtN <- trigamma((1/lambda + 1/thetaN)^(-1)) # trigamma function
# comparing the three
c(VarOdN = VarOdN, VarOlN = VarOlN, VarOtN = VarOtN)
```

```
## VarOdN VarOlN VarOtN
## 0.6331133 0.4904882 0.8730952
```

```
# Full model
thetaF <- getME(parmodGLMERf, "glmer.nb.theta")
VarOdF <- 1/lambda + 1/thetaF # the delta method
VarOlF <- log(1 + (1/lambda) + (1/thetaF)) # log-normal approximation
VarOtF <- trigamma((1/lambda + 1/thetaF)^(-1)) # trigamma function
# comparing the three
c(VarOdF = VarOdF, VarOlF = VarOlF, VarOtF = VarOtF)
```

```
## VarOdF VarOlF VarOtF
## 0.3346772 0.2886894 0.3967992
```

```
# R2[GLMM(m)] - marginal R2[GLMM]
R2glmmM <- VarF/(VarF + sum(as.numeric(VarCorr(parmodGLMERf)))) + VarOtF
# R2[GLMM(c)] - conditional R2[GLMM] for full model
R2glmmC <- (VarF + sum(as.numeric(VarCorr(parmodGLMERf))))/(VarF + sum(as.numeric(VarCorr(parmodGLMERf)) + VarOtF)
# Raw unadjusted ICC[Population]
ICCrwPop <- as.numeric(VarCorr(parmodGLMERr)$Population)/(sum(as.numeric(VarCorr(parmodGLMERr))) + VarOtN)
# adjusted ICC[Population]
ICCadjPop <- as.numeric(VarCorr(parmodGLMERf)$Population)/(sum(as.numeric(VarCorr(parmodGLMERf))) + VarOtF)
# Raw unadjusted ICC[Container]
ICCrwCont <- as.numeric(VarCorr(parmodGLMERr)$Container)/(sum(as.numeric(VarCorr(parmodGLMERr))) +
```

```

    VarOtN)
# adjusted ICC[Container]
ICCadjCont <- as.numeric(VarCorr(parmodGLMERf)$Container)/(sum(as.numeric(VarCorr(parmodGLMERf))) +
    VarOtF)
# comparing the results
c(R2glmmM = R2glmmM, R2glmmC = R2glmmC, ICCrawPop = ICCrawPop, ICCadjPop = ICCadjPop,
    ICCrawCont = ICCrawCont, ICCadjCont = ICCadjCont)

```

```

##      R2glmmM      R2glmmC  ICCrawPop  ICCadjPop  ICCrawCont  ICCadjCont
## 0.4877776 0.8687492 0.1155368 0.3482775 0.6131749 0.3954846

```

### (3) Size models: Gamma GLMMs with log link

Below we use three functions: `glmmabmb`, `glmmPQL` and `glmer`. They produce similar results both for regression coefficients but not for variance components (random effects). The `glmer` variance components were different from the others.

#### (3.1) `glmmabmb` size models

```

# Fit null model without fixed effects (but including all random effects)
sizemodADMBr <- glmmadmb(BodyL ~ 1 + (1 | Population) + (1 | Container), family = "gamma",
    data = DataAll)
# Fit alternative model including fixed and all random effects
sizemodADMBf <- glmmadmb(BodyL ~ Sex + Treatment + Habitat + (1 | Population) +
    (1 | Container), family = "gamma", data = DataAll)
# View model fits for both models
summary(sizemodADMBr)

```

```

##
## Call:
## glmmadmb(formula = BodyL ~ 1 + (1 | Population) + (1 | Container),
##   data = DataAll, family = "gamma")
##
## AIC: 3379.9
##
## Coefficients:
##             Estimate Std. Error z value Pr(>|z|)
## (Intercept)  2.6522     0.0186    143 <2e-16 ***
## ---
## Signif. codes:  0 '***' 0.001 '**' 0.01 '*' 0.05 '.' 0.1 ' ' 1
##
## Number of observations: total=960, Population=12, Container=120
## Random effect variance(s):
## Group=Population
##             Variance StdDev
## (Intercept) 0.002666 0.05163
## Group=Container
##             Variance StdDev
## (Intercept) 0.01397 0.1182
##

```

```
## Gamma shape parameter: 147.88 (std. err.: 7.2064)
##
## Log-likelihood: -1685.93
```

```
summary(sizemodADMBf)
```

```
##
## Call:
## glmLambdabf(formula = BodyL ~ Sex + Treatment + Habitat + (1 | Population) +
## (1 | Container), data = DataAll, family = "gamma")
##
## AIC: 3139.5
##
## Coefficients:
##          Estimate Std. Error z value Pr(>|z|)
## (Intercept)  2.73720    0.01944  140.77 < 2e-16 ***
## SexMale      -0.21265    0.00869  -24.46 < 2e-16 ***
## TreatmentExp  0.03340    0.00517   6.46 1.1e-10 ***
## HabitatWet    0.00901    0.00517   1.74  0.082 .
## ---
## Signif. codes:  0 '***' 0.001 '**' 0.01 '*' 0.05 '.' 0.1 ' ' 1
##
## Number of observations: total=960, Population=12, Container=120
## Random effect variance(s):
## Group=Population
##          Variance StdDev
## (Intercept) 0.003925 0.06265
## Group=Container
##          Variance StdDev
## (Intercept) 0.001464 0.03826
##
## Gamma shape parameter: 155.72 (std. err.: 7.5896)
##
## Log-likelihood: -1562.77
```

```
# Calculation of the variance in fitted values
VarF <- var(as.vector(model.matrix(sizemodADMBf) %*% fixef(sizemodADMBf)))
```

```
# getting the observation-level variance Null model
nuN <- sizemodADMBf$alpha # overdispersion omega is alpha in glmmLambdabf
VarOdN <- 1/nuN # the delta method
VarOlN <- log(1 + 1/nuN) # log-normal approximation
VarOtN <- trigamma(nuN) # trigamma function
# comparing the three
c(VarOdN = VarOdN, VarOlN = VarOlN, VarOtN = VarOtN)
```

```
##          VarOdN          VarOlN          VarOtN
## 0.006762240 0.006739478 0.006785155
```

```
# Full model
nuF <- sizemodADMBf$alpha # overdispersion omega is alpha in glmmLambdabf
VarOdF <- 1/nuF # the delta method
```



```

Var0lF <- log(1 + 1/nuF) # log-normal approximation
Var0tF <- trigamma(nuF) # trigamma function
# comparing the three
c(Var0dF = Var0dF, Var0lF = Var0lF, Var0tF = Var0tF)

```

```

##      Var0dF      Var0lF      Var0tF
## 0.006421783 0.006401251 0.006442446

```

```

# R2[GLMM(m)] - marginal R2[GLMM]
R2glmmM <- VarF/(VarF + sum(as.numeric(VarCorr(sizemodADMBf))) + Var0tF)
# R2[GLMM(c)] - conditional R2[GLMM] for full model
R2glmmC <- (VarF + sum(as.numeric(VarCorr(sizemodADMBf))))/(VarF + sum(as.numeric(VarCorr(sizemodADMBf)) +
  Var0tF))
# Raw unadjusted ICC[Population]
ICCrwPop <- VarCorr(sizemodADMBr)$Population[1]/(sum(as.numeric(VarCorr(sizemodADMBr))) +
  Var0tN)
# adjusted ICC[Population]
ICCadjPop <- VarCorr(sizemodADMBf)$Population[1]/(sum(as.numeric(VarCorr(sizemodADMBf))) +
  Var0tF)
# Raw unadjusted ICC[Container]
ICCrwCont <- VarCorr(sizemodADMBr)$Container[1]/(sum(as.numeric(VarCorr(sizemodADMBr))) +
  Var0tN)
# adjusted ICC[Container]
ICCadjCont <- VarCorr(sizemodADMBf)$Container[1]/(sum(as.numeric(VarCorr(sizemodADMBf))) +
  Var0tF)
# comparing the results
c(R2glmmM = R2glmmM, R2glmmC = R2glmmC, ICCrwPop = ICCrwPop, ICCadjPop = ICCadjPop,
  ICCrwCont = ICCrwCont, ICCadjCont = ICCadjCont)

```

```

##      R2glmmM      R2glmmC      ICCrwPop      ICCadjPop      ICCrwCont      ICCadjCont
## 0.4954184 0.7252318 0.1137893 0.3317261 0.5965656 0.1237274

```

### (3.2) glmpQL size models

```

# Fit null model without fixed effects (but including all random effects)
sizemodPQLr <- glmpQL(BodyL ~ 1, random = list(~1 | Population, ~1 | Container),
  family = Gamma(link = log), data = DataAll)
# Fit alternative model including fixed and all random effects
sizemodPQLf <- glmpQL(BodyL ~ Sex + Treatment + Habitat, random = list(~1 |
  Population, ~1 | Container), family = Gamma(link = log), data = DataAll)
# View model fits for both models
summary(sizemodPQLr)

```

```

## Linear mixed-effects model fit by maximum likelihood
## Data: DataAll
##      AIC BIC logLik
##      NA  NA    NA
##
## Random effects:
## Formula: ~1 | Population

```

```

##          (Intercept)
## StdDev:  0.05163009
##
## Formula: ~1 | Container %in% Population
##          (Intercept)  Residual
## StdDev:  0.1182651 0.08168051
##
## Variance function:
## Structure: fixed weights
## Formula: ~invwt
## Fixed effects: BodyL ~ 1
##          Value Std.Error DF  t-value p-value
## (Intercept) 2.651846 0.01860119 840 142.5633      0
##
## Standardized Within-Group Residuals:
##          Min          Q1          Med          Q3          Max
## -3.03349978 -0.62464740  0.05334217  0.66652467  2.94836006
##
## Number of Observations: 960
## Number of Groups:
##          Population Container %in% Population
##          12                120

```

```
summary(sizemodPQLf)
```

```

## Linear mixed-effects model fit by maximum likelihood
## Data: DataAll
##   AIC BIC logLik
##   NA  NA   NA
##
## Random effects:
## Formula: ~1 | Population
##          (Intercept)
## StdDev:  0.06264751
##
## Formula: ~1 | Container %in% Population
##          (Intercept)  Residual
## StdDev:  0.03841503 0.07954664
##
## Variance function:
## Structure: fixed weights
## Formula: ~invwt
## Fixed effects: BodyL ~ Sex + Treatment + Habitat
##          Value Std.Error DF  t-value p-value
## (Intercept) 2.7369180 0.019483361 838 140.47463 0.0000
## SexMale     -0.2126482 0.008710447 107 -24.41300 0.0000
## TreatmentExp 0.0333985 0.005145444 838  6.49089 0.0000
## HabitatWet  0.0090129 0.005145444 838  1.75162 0.0802
## Correlation:
##          (Intr) SexMal TrtmnE
## SexMale     -0.224
## TreatmentExp -0.132  0.000
## HabitatWet  -0.132  0.000  0.000
##

```

```
## Standardized Within-Group Residuals:
##      Min      Q1      Med      Q3      Max
## -2.9532554 -0.5984901  0.0251208  0.6208741  2.7806472
##
## Number of Observations: 960
## Number of Groups:
##           Population Container %in% Population
##                12                120
```

```
# Calculation of the variance in fitted values
VarF <- var(as.vector(model.matrix(~Sex + Treatment + Habitat, data = DataAll) %*%
  fixef(sizemodPQLf)))
```

```
# getting the observation-level variance Null model
nuN <- 1/as.numeric(VarCorr(sizemodPQLr)[5, 1]) # note that glmmPQL report 1/nu not nu as residual var
VarOdN <- 1/nuN # the delta method
VarOlN <- log(1 + 1/nuN) # log-normal approximation
VarOtN <- trigamma(nuN) # trigamma function
# comparing the three
c(VarOdN = VarOdN, VarOlN = VarOlN, VarOtN = VarOtN)
```

```
##      VarOdN      VarOlN      VarOtN
## 0.006671705 0.006649548 0.006694010
```

```
# Full model
nuF <- 1/as.numeric(VarCorr(sizemodPQLf)[5, 1]) # note that glmmPQL report 1/nu not nu as residual var
VarOdF <- 1/nuF # the delta method
VarOlF <- log(1 + 1/nuF) # log-normal approximation
VarOtF <- trigamma(nuF) # trigamma function
# comparing the three
c(VarOdF = VarOdF, VarOlF = VarOlF, VarOtF = VarOtF)
```

```
##      VarOdF      VarOlF      VarOtF
## 0.006327667 0.006307731 0.006347729
```

```
# R2[GLMM(m)] - marginal R2[GLMM]
R2glmmM <- VarF/(VarF + sum(as.numeric(VarCorr(sizemodPQLf)[c(2, 4), 1]))) +
  VarOtF)
# R2[GLMM(c)] - conditional R2[GLMM] for full model
R2glmmC <- (VarF + sum(as.numeric(VarCorr(sizemodPQLf)[c(2, 4), 1])))/(VarF +
  sum(as.numeric(VarCorr(sizemodPQLf)[c(2, 4), 1])) + VarOtF)
# Raw unadjusted ICC[Population]
ICCCrawPop <- as.numeric(VarCorr(sizemodPQLr)[2, 1])/(sum(as.numeric(VarCorr(sizemodPQLr)[c(2,
  4), 1])) + VarOtN)
# adjusted ICC[Population]
ICCCadjPop <- as.numeric(VarCorr(sizemodPQLf)[2, 1])/(sum(as.numeric(VarCorr(sizemodPQLf)[c(2,
  4), 1])) + VarOtF)
# Raw unadjusted ICC[Container]
ICCCrawCont <- as.numeric(VarCorr(sizemodPQLr)[4, 1])/(sum(as.numeric(VarCorr(sizemodPQLr)[c(2,
  4), 1])) + VarOtN)
# adjusted ICC[Container]
ICCCadjCont <- as.numeric(VarCorr(sizemodPQLf)[4, 1])/(sum(as.numeric(VarCorr(sizemodPQLf)[c(2,
```

```

4), 1])) + VarOfF)
# comparing the results
c(R2glmmM = R2glmmM, R2glmmC = R2glmmC, ICCrawPop = ICCrawPop, ICCadjPop = ICCadjPop,
  ICCrawCont = ICCrawCont, ICCadjCont = ICCadjCont)

```

```

##      R2glmmM      R2glmmC  ICCrawPop  ICCadjPop  ICCrawCont  ICCadjCont
## 0.4971737 0.7283143 0.1141794 0.3340704 0.5990938 0.1256124

```

### (3.3) glmer size models

```

# Fit null model without fixed effects (but including all random effects)
sizemodeGLMERr <- glmer(BodyL ~ 1 + (1 | Population) + (1 | Container), family = Gamma(link = log),
  data = DataAll)
# Fit alternative model including fixed and all random effects
sizemodeGLMERf <- glmer(BodyL ~ Sex + Treatment + Habitat + (1 | Population) +
  (1 | Container), family = Gamma(link = log), data = DataAll)
# View model fits for both models
summary(sizemodeGLMERr)

```

```

## Generalized linear mixed model fit by maximum likelihood (Laplace
## Approximation) [glmerMod]
## Family: Gamma ( log )
## Formula: BodyL ~ 1 + (1 | Population) + (1 | Container)
## Data: DataAll
##
##      AIC      BIC   logLik deviance df.resid
## 3185.5  3205.0 -1588.7  3177.5     956
##
## Scaled residuals:
##      Min       1Q   Median       3Q      Max
## -2.83568 -0.55540  0.05456  0.60620  2.62809
##
## Random effects:
## Groups      Name      Variance Std.Dev.
## Container (Intercept) 0.0054135 0.07358
## Population (Intercept) 0.0004434 0.02106
## Residual              0.0083710 0.09149
## Number of obs: 960, groups:  Container, 120; Population, 12
##
## Fixed effects:
##              Estimate Std. Error t value Pr(>|z|)
## (Intercept)  2.64882    0.02596    102 <2e-16 ***
## ---
## Signif. codes:  0 '***' 0.001 '**' 0.01 '*' 0.05 '.' 0.1 ' ' 1

```

```
summary(sizemodeGLMERf)
```

```

## Generalized linear mixed model fit by maximum likelihood (Laplace
## Approximation) [glmerMod]
## Family: Gamma ( log )

```

```

## Formula:
## BodyL ~ Sex + Treatment + Habitat + (1 | Population) + (1 | Container)
## Data: DataAll
##
##      AIC      BIC  logLik deviance df.resid
## 3042.2  3076.2 -1514.1  3028.2    953
##
## Scaled residuals:
##      Min       1Q   Median       3Q      Max
## -2.97652 -0.58856  0.02293  0.62893  2.62252
##
## Random effects:
## Groups      Name      Variance Std.Dev.
## Container (Intercept) 0.0012338 0.03513
## Population (Intercept) 0.0006937 0.02634
## Residual          0.0067507 0.08216
## Number of obs: 960, groups: Container, 120; Population, 12
##
## Fixed effects:
##              Estimate Std. Error t value Pr(>|z|)
## (Intercept)  2.734713   0.026910  101.62 < 2e-16 ***
## SexMale      -0.212780   0.012255  -17.36 < 2e-16 ***
## TreatmentExp  0.033385   0.004999   6.68 2.41e-11 ***
## HabitatWet   0.009007   0.004999   1.80  0.0716 .
## ---
## Signif. codes:  0 '***' 0.001 '**' 0.01 '*' 0.05 '.' 0.1 ' ' 1
##
## Correlation of Fixed Effects:
##              (Intr) SexMal TrtmnE
## SexMale      -0.227
## TreatmntExp -0.092 -0.001
## HabitatWet  -0.092  0.000 -0.004

```

```

# Calculation of the variance in fitted values
VarF <- var(as.vector(model.matrix(sizemodeGLMERf) %*% fixef(sizemodeGLMERf)))

```

```

# getting the observation-level variance Null model
nuN <- 1/attr(VarCorr(sizemodeGLMERr), "sc")^2 # note that glmer report 1/nu not nu as residual varian
VarOdN <- 1/nuN # the delta method
VarOlN <- log(1 + 1/nuN) # log-normal approximation
VarOtN <- trigamma(nuN) # trigamma function
# comparing the three
c(VarOdN = VarOdN, VarOlN = VarOlN, VarOtN = VarOtN)

```

```

##      VarOdN      VarOlN      VarOtN
## 0.008370998 0.008336156 0.008406133

```

```

# Full model
nuF <- 1/attr(VarCorr(sizemodeGLMERf), "sc")^2 # note that glmer report 1/nu not nu as residual varian
VarOdF <- 1/nuF # the delta method
VarOlF <- log(1 + 1/nuF) # log-normal approximation
VarOtF <- trigamma(nuF) # trigamma function
# comparing the three
c(VarOdF = VarOdF, VarOlF = VarOlF, VarOtF = VarOtF)

```

```
##      Var0dF      Var0lF      Var0tF
## 0.006750704 0.006728020 0.006773541
```

```
# R2[GLMM(m)] - marginal R2[GLMM]
R2glmmM <- VarF/(VarF + sum(as.numeric(VarCorr(sizemodeGLMERf)))) + Var0tF
# R2[GLMM(c)] - conditional R2[GLMM] for full model
R2glmmC <- (VarF + sum(as.numeric(VarCorr(sizemodeGLMERf))))/(VarF + sum(as.numeric(VarCorr(sizemodeGLMERf)))) + Var0tF
# Raw unadjusted ICC[Population]
ICCrwPop <- as.numeric(VarCorr(sizemodeGLMERr)$Population)/(sum(as.numeric(VarCorr(sizemodeGLMERr)))) + Var0tN
# adjusted ICC[Population]
ICCadjPop <- as.numeric(VarCorr(sizemodeGLMERf)$Population)/(sum(as.numeric(VarCorr(sizemodeGLMERf)))) + Var0tF
# Raw unadjusted ICC[Container]
ICCrwCont <- as.numeric(VarCorr(sizemodeGLMERr)$Container)/(sum(as.numeric(VarCorr(sizemodeGLMERr)))) + Var0tN
# adjusted ICC[Container]
ICCadjCont <- as.numeric(VarCorr(sizemodeGLMERf)$Container)/(sum(as.numeric(VarCorr(sizemodeGLMERf)))) + Var0tF
# comparing the results
c(R2glmmM = R2glmmM, R2glmmC = R2glmmC, ICCrwPop = ICCrwPop, ICCadjPop = ICCadjPop,
  ICCrwCont = ICCrwCont, ICCadjCont = ICCadjCont)
```

```
##      R2glmmM      R2glmmC      ICCrwPop      ICCadjPop      ICCrwCont      ICCadjCont
## 0.57202668 0.66683554 0.03109067 0.07972609 0.37954437 0.14180373
```

## (4) Exploration models: Gamma GLMMs with log link

Below we use three functions: `glmmabmb`, `glmmPQL` and `glmer`. As for the previous section, they produce similar results both for regression coefficients but not for variance components (random effects). The `glmer` variance components were different from the others.

### (4.1) `glmmabmb` exploration models

```
# Fit null model without fixed effects (but including all random effects)
explmodADMBr <- glmmadmb(Exploration ~ 1 + (1 | Population) + (1 | Container),
  family = "gamma", data = DataAll)
# Fit alternative model including fixed and all random effects
explmodADMBf <- glmmadmb(Exploration ~ Sex + Treatment + Habitat + (1 | Population) +
  (1 | Container), family = "gamma", data = DataAll)
# View model fits for both models
summary(explmodADMBr)
```

```
##
## Call:
## glmmadmb(formula = Exploration ~ 1 + (1 | Population) + (1 |
##      Container), data = DataAll, family = "gamma")
##
## AIC: 11223.8
```

```
##
## Coefficients:
##           Estimate Std. Error z value Pr(>|z|)
## (Intercept)  4.752      0.101   47.3  <2e-16 ***
## ---
## Signif. codes:  0 '***' 0.001 '**' 0.01 '*' 0.05 '.' 0.1 ' ' 1
##
## Number of observations: total=960, Population=12, Container=120
## Random effect variance(s):
## Group=Population
##           Variance StdDev
## (Intercept)  0.07137 0.2672
## Group=Container
##           Variance StdDev
## (Intercept)  0.3639 0.6032
##
## Gamma shape parameter: 0.99229 (std. err.: 0.042061)
##
## Log-likelihood: -5607.89
```

```
summary(explmodADMBf)
```

```
##
## Call:
## glmmadmb(formula = Exploration ~ Sex + Treatment + Habitat +
##           (1 | Population) + (1 | Container), data = DataAll, family = "gamma")
##
## AIC: 9004.3
##
## Coefficients:
##           Estimate Std. Error z value Pr(>|z|)
## (Intercept)  4.0556      0.1088   37.3  <2e-16 ***
## SexMale      -1.1051      0.0768  -14.4  <2e-16 ***
## TreatmentExp  2.0076      0.0217   92.3  <2e-16 ***
## HabitatWet   -0.5604      0.0217  -25.8  <2e-16 ***
## ---
## Signif. codes:  0 '***' 0.001 '**' 0.01 '*' 0.05 '.' 0.1 ' ' 1
##
## Number of observations: total=960, Population=12, Container=120
## Random effect variance(s):
## Group=Population
##           Variance StdDev
## (Intercept)  0.1037 0.3221
## Group=Container
##           Variance StdDev
## (Intercept)  0.163 0.4038
##
## Gamma shape parameter: 8.9434 (std. err.: 0.42749)
##
## Log-likelihood: -4495.13
```

```
# Calculation of the variance in fitted values
VarF <- var(as.vector(model.matrix(explmodADMBf) %*% fixef(explmodADMBf)))
```

```

# getting the observation-level variance Null model
nuN <- explmodADMBr$alpha #note nu theta is called alpha in glmmadmb
VarOdN <- 1/nuN # the delta method
VarOlN <- log(1 + 1/nuN) # log-normal approximation
VarOtN <- trigamma(nuN) # trigamma function
# comparing the three
c(VarOdN = VarOdN, VarOlN = VarOlN, VarOtN = VarOtN)

```

```

##      VarOdN      VarOlN      VarOtN
## 1.0077699 0.6970246 1.6636647

```

```

# Full model
nuF <- explmodADMBf$alpha #note nu theta is called alpha in glmmadmb
VarOdF <- 1/nuF # the delta method
VarOlF <- log(1 + 1/nuF) # log-normal approximation
VarOtF <- trigamma(nuF) # trigamma function
# comparing the three
c(VarOdF = VarOdF, VarOlF = VarOlF, VarOtF = VarOtF)

```

```

##      VarOdF      VarOlF      VarOtF
## 0.1118143 0.1059932 0.1182979

```

```

# R2[GLMM(m)] - marginal R2[GLMM]
R2glmmM <- VarF/(VarF + sum(as.numeric(VarCorr(explmodADMBf))) + VarOtF)
# R2[GLMM(c)] - conditional R2[GLMM] for full model
R2glmmC <- (VarF + sum(as.numeric(VarCorr(explmodADMBf))))/(VarF + sum(as.numeric(VarCorr(explmodADMBf)) + VarOtF))
# Raw unadjusted ICC[Population]
ICCrawPop <- VarCorr(explmodADMBr)$Population[1]/(sum(as.numeric(VarCorr(explmodADMBr))) + VarOtN)
# adjusted ICC[Population]
ICCadjPop <- VarCorr(explmodADMBf)$Population[1]/(sum(as.numeric(VarCorr(explmodADMBf))) + VarOtF)
# Raw unadjusted ICC[Container]
ICCrawCont <- VarCorr(explmodADMBr)$Container[1]/(sum(as.numeric(VarCorr(explmodADMBr))) + VarOtN)
# adjusted ICC[Container]
ICCadjCont <- VarCorr(explmodADMBf)$Container[1]/(sum(as.numeric(VarCorr(explmodADMBf))) + VarOtF)
# comparing the results
c(R2glmmM = R2glmmM, R2glmmC = R2glmmC, ICCrawPop = ICCrawPop, ICCadjPop = ICCadjPop,
  ICCrawCont = ICCrawCont, ICCadjCont = ICCadjCont)

```

```

##      R2glmmM      R2glmmC      ICCrawPop      ICCadjPop      ICCrawCont      ICCadjCont
## 0.78342883 0.93346476 0.03400497 0.26938804 0.17336939 0.42339084

```

#### (4.2) glmPQL exploration models



```

# Fit null model without fixed effects (but including all random effects)
explmodPQLr <- glmmPQL(Exploration ~ 1, random = list(~1 | Population, ~1 |
  Container), family = Gamma(link = log), data = DataAll)
# Fit alternative model including fixed and all random effects
explmodPQLf <- glmmPQL(Exploration ~ Sex + Treatment + Habitat, random = list(~1 |
  Population, ~1 | Container), family = Gamma(link = log), data = DataAll)
# View model fits for both models
summary(explmodPQLr)

```

```

## Linear mixed-effects model fit by maximum likelihood
## Data: DataAll
##   AIC BIC logLik
##   NA  NA   NA
##
## Random effects:
## Formula: ~1 | Population
##          (Intercept)
## StdDev:   0.2722396
##
## Formula: ~1 | Container %in% Population
##          (Intercept) Residual
## StdDev:   0.6292432 0.9028776
##
## Variance function:
## Structure: fixed weights
## Formula: ~invwt
## Fixed effects: Exploration ~ 1
##              Value Std.Error DF t-value p-value
## (Intercept) 4.697597 0.1016645 840 46.20684      0
##
## Standardized Within-Group Residuals:
##           Min      Q1      Med      Q3      Max
## -1.0973802 -0.8508788 -0.4618470  0.7489602  2.2125998
##
## Number of Observations: 960
## Number of Groups:
##           Population Container %in% Population
##           12                120

```

```
summary(explmodPQLf)
```

```

## Linear mixed-effects model fit by maximum likelihood
## Data: DataAll
##   AIC BIC logLik
##   NA  NA   NA
##
## Random effects:
## Formula: ~1 | Population
##          (Intercept)
## StdDev:   0.3221272
##
## Formula: ~1 | Container %in% Population

```

```

##      (Intercept) Residual
## StdDev:   0.4061742 0.3123817
##
## Variance function:
## Structure: fixed weights
## Formula: ~invwt
## Fixed effects: Exploration ~ Sex + Treatment + Habitat
##           Value Std.Error DF   t-value p-value
## (Intercept)  4.048990 0.10887040 838  37.19092     0
## SexMale      -1.105110 0.07701008 107 -14.35021     0
## TreatmentExp  2.007820 0.02020630 838  99.36606     0
## HabitatWet   -0.560711 0.02020630 838 -27.74930     0
## Correlation:
##           (Intr) SexMal TrtmnE
## SexMale    -0.354
## TreatmentExp -0.093  0.000
## HabitatWet  -0.093  0.000  0.000
##
## Standardized Within-Group Residuals:
##           Min           Q1           Med           Q3           Max
## -3.03017476 -0.48055376 -0.03782469  0.49816646  5.78965007
##
## Number of Observations: 960
## Number of Groups:
##           Population Container %in% Population
##                   12                   120

```

```

# Calculation of the variance in fitted values
VarF <- var(as.vector(model.matrix(~Sex + Treatment + Habitat, data = DataAll) %*%
  fixef(explmodPQLf)))

```

```

# getting the observation-level variance Null model
nuN <- 1/as.numeric(VarCorr(explmodPQLr)[5, 1]) # note that glmmPQL report 1/nu not nu as residual var
VarOdN <- 1/nuN # the delta method
VarOlN <- log(1 + 1/nuN) # log-normal approximation
VarOtN <- trigamma(nuN) # trigamma function
# comparing the three
c(VarOdN = VarOdN, VarOlN = VarOlN, VarOtN = VarOtN)

```

```

##   VarOdN   VarOlN   VarOtN
## 0.815188 0.596189 1.229023

```

```

# Full model
nuF <- 1/as.numeric(VarCorr(explmodPQLf)[5, 1]) # note that glmmPQL report 1/nu not nu as residual var
VarOdF <- 1/nuF # the delta method
VarOlF <- log(1 + 1/nuF) # log-normal approximation
VarOtF <- trigamma(nuF) # trigamma function
# comparing the three
c(VarOdF = VarOdF, VarOlF = VarOlF, VarOtF = VarOtF)

```

```

##   VarOdF   VarOlF   VarOtF
## 0.09758235 0.09310990 0.10249808

```

```

# R2[GLMM(m)] - marginal R2[GLMM]
R2gllmmM <- VarF/(VarF + sum(as.numeric(VarCorr(explmodPQLf)[c(2, 4), 1])) +
  VarOtF)
# R2[GLMM(c)] - conditional R2[GLMM] for full model
R2gllmmC <- (VarF + sum(as.numeric(VarCorr(explmodPQLf)[c(2, 4), 1])))/(VarF +
  sum(as.numeric(VarCorr(explmodPQLf)[c(2, 4), 1])) + VarOtF)
# Raw unadjusted ICC[Population]
ICCrawPop <- as.numeric(VarCorr(explmodPQLr)[2, 1])/(sum(as.numeric(VarCorr(explmodPQLr)[c(2,
  4), 1])) + VarOtN)
# adjusted ICC[Population]
ICCadjPop <- as.numeric(VarCorr(explmodPQLf)[2, 1])/(sum(as.numeric(VarCorr(explmodPQLf)[c(2,
  4), 1])) + VarOtF)
# Raw unadjusted ICC[Container]
ICCrawCont <- as.numeric(VarCorr(explmodPQLr)[4, 1])/(sum(as.numeric(VarCorr(explmodPQLr)[c(2,
  4), 1])) + VarOtN)
# adjusted ICC[Container]
ICCadjCont <- as.numeric(VarCorr(explmodPQLf)[4, 1])/(sum(as.numeric(VarCorr(explmodPQLf)[c(2,
  4), 1])) + VarOtF)
# comparing the results
c(R2gllmmM = R2gllmmM, R2gllmmC = R2gllmmC, ICCrawPop = ICCrawPop, ICCadjPop = ICCadjPop,
  ICCrawCont = ICCrawCont, ICCadjCont = ICCadjCont)

```

```

##      R2gllmmM      R2gllmmC  ICCrawPop  ICCadjPop  ICCrawCont  ICCadjCont
## 0.78959865 0.94190914 0.04362017 0.27951061 0.23303547 0.44439394

```

### (4.3) glmer exploration models

```

# Fit null model without fixed effects (but including all random effects)
explmodGLMERr <- glmer(Exploration ~ 1 + (1 | Population) + (1 | Container),
  family = Gamma(link = log), data = DataAll)
# Fit alternative model including fixed and all random effects
explmodGLMERf <- glmer(Exploration ~ Sex + Treatment + Habitat + (1 | Population) +
  (1 | Container), family = Gamma(link = log), data = DataAll)
# View model fits for both models
summary(explmodGLMERr)

```

```

## Generalized linear mixed model fit by maximum likelihood (Laplace
## Approximation) [glmerMod]
## Family: Gamma ( log )
## Formula: Exploration ~ 1 + (1 | Population) + (1 | Container)
## Data: DataAll
##
##      AIC      BIC    logLik deviance df.resid
## 11234.7 11254.2 -5613.4 11226.7      956
##
## Scaled residuals:
##      Min       1Q   Median       3Q      Max
## -1.0857 -0.8400 -0.4647  0.7478  2.2763
##
## Random effects:
## Groups      Name          Variance Std.Dev.

```

```

## Container (Intercept) 0.32991 0.5744
## Population (Intercept) 0.06202 0.2490
## Residual 0.83788 0.9154
## Number of obs: 960, groups: Container, 120; Population, 12
##
## Fixed effects:
## Estimate Std. Error t value Pr(>|z|)
## (Intercept) 4.6995 0.1021 46.01 <2e-16 ***
## ---
## Signif. codes: 0 '***' 0.001 '**' 0.01 '*' 0.05 '.' 0.1 ' ' 1

```

```
summary(explmodGLMERf)
```

```

## Generalized linear mixed model fit by maximum likelihood (Laplace
## Approximation) [glmerMod]
## Family: Gamma ( log )
## Formula: Exploration ~ Sex + Treatment + Habitat + (1 | Population) +
## (1 | Container)
## Data: DataAll
##
## AIC BIC logLik deviance df.resid
## 8852 8886 -4419 8838 953
##
## Scaled residuals:
## Min 1Q Median 3Q Max
## -2.7783 -0.4509 -0.0243 0.4693 5.5650
##
## Random effects:
## Groups Name Variance Std.Dev.
## Container (Intercept) 0.06924 0.2631
## Population (Intercept) 0.01896 0.1377
## Residual 0.11713 0.3422
## Number of obs: 960, groups: Container, 120; Population, 12
##
## Fixed effects:
## Estimate Std. Error t value Pr(>|z|)
## (Intercept) 4.02695 0.12589 31.99 <2e-16 ***
## SexMale -1.10733 0.09723 -11.39 <2e-16 ***
## TreatmentExp 2.00823 0.02091 96.06 <2e-16 ***
## HabitatWet -0.56120 0.02088 -26.88 <2e-16 ***
## ---
## Signif. codes: 0 '***' 0.001 '**' 0.01 '*' 0.05 '.' 0.1 ' ' 1
##
## Correlation of Fixed Effects:
## (Intr) SexMal TrtmnE
## SexMale -0.386
## TreatmntExp -0.081 -0.002
## HabitatWet -0.083 0.003 -0.019

```

```

# Calculation of the variance in fitted values
VarF <- var(as.vector(model.matrix(explmodGLMERf) %*% fixef(explmodGLMERf)))

# getting the observation-level variance Null model

```

```

nuN <- 1/attr(VarCorr(explmodGLMERr), "sc")^2 # note that glmer report 1/nu not nu as residual variance
VarOdN <- 1/nuN # the delta method
VarOlN <- log(1 + 1/nuN) # log-normal approximation
VarOtN <- trigamma(nuN) # trigamma function
# comparing the three
c(VarOdN = VarOdN, VarOlN = VarOlN, VarOtN = VarOtN)

```

```

##      VarOdN      VarOlN      VarOtN
## 0.8378761 0.6086106 1.2770627

```

```

# Full model
nuF <- 1/attr(VarCorr(explmodGLMERf), "sc")^2 # note that glmer report 1/nu not nu as residual variance
VarOdF <- 1/nuF # the delta method
VarOlF <- log(1 + 1/nuF) # log-normal approximation
VarOtF <- trigamma(nuF) # trigamma function
# comparing the three
c(VarOdF = VarOdF, VarOlF = VarOlF, VarOtF = VarOtF)

```

```

##      VarOdF      VarOlF      VarOtF
## 0.1171296 0.1107625 0.1242564

```

```

# R2[GLMM(m)] - marginal R2[GLMM]
R2glmmM <- VarF/(VarF + sum(as.numeric(VarCorr(explmodGLMERf))) + VarOtF)
# R2[GLMM(c)] - conditional R2[GLMM] for full model
R2glmmC <- (VarF + sum(as.numeric(VarCorr(explmodGLMERf))))/(VarF + sum(as.numeric(VarCorr(explmodGLMERf))) + VarOtF)
# Raw unadjusted ICC[Population]
ICCrwPop <- as.numeric(VarCorr(explmodGLMERr)$Population)/(sum(as.numeric(VarCorr(explmodGLMERr))) + VarOtN)
# adjusted ICC[Population]
ICCadjPop <- as.numeric(VarCorr(explmodGLMERf)$Population)/(sum(as.numeric(VarCorr(explmodGLMERf))) + VarOtF)
# Raw unadjusted ICC[Container]
ICCrwCont <- as.numeric(VarCorr(explmodGLMERr)$Container)/(sum(as.numeric(VarCorr(explmodGLMERr))) + VarOtN)
# adjusted ICC[Container]
ICCadjCont <- as.numeric(VarCorr(explmodGLMERf)$Container)/(sum(as.numeric(VarCorr(explmodGLMERf))) + VarOtF)
# comparing the results
c(R2glmmM = R2glmmM, R2glmmC = R2glmmC, ICCrwPop = ICCrwPop, ICCadjPop = ICCadjPop,
  ICCrwCont = ICCrwCont, ICCadjCont = ICCadjCont)

```

```

##      R2glmmM      R2glmmC      ICCrwPop      ICCadjPop      ICCrwCont      ICCadjCont
## 0.86782820 0.92269908 0.03715981 0.08923756 0.19767104 0.32591065

```

## (5) Morph models: Binomial (binary) GLMMs with logit link

Below we use two functions: `glmmabmb` and `glmer`. They produce similar results both for regression coefficients (fixed effects) and variance components (random effects).

## (5.1) glmmabmb morph models

```
# Fit null model without fixed effects (but including all random effects)
morphmodADMBr <- glmmadmb(Colour ~ 1 + (1 | Population) + (1 | Container), family = "binomial",
  data = DataMale)
# Fit alternative model including fixed and all random effects
morphmodADMBf <- glmmadmb(Colour ~ Treatment + Habitat + (1 | Population) +
  (1 | Container), family = "binomial", data = DataMale)
# View model fits for both models
summary(morphmodADMBr)
```

```
##
## Call:
## glmmadmb(formula = Colour ~ 1 + (1 | Population) + (1 | Container),
##   data = DataMale, family = "binomial")
##
## AIC: 605.5
##
## Coefficients:
##           Estimate Std. Error z value Pr(>|z|)
## (Intercept)  -0.108      0.311  -0.35   0.73
##
## Number of observations: total=480, Population=12, Container=60
## Random effect variance(s):
## Group=Population
##           Variance StdDev
## (Intercept)   1.002  1.001
## Group=Container
##           Variance StdDev
## (Intercept)   0.1356 0.3683
##
##
## Log-likelihood: -299.759
```

```
summary(morphmodADMBf)
```

```
##
## Call:
## glmmadmb(formula = Colour ~ Treatment + Habitat + (1 | Population) +
##   (1 | Container), data = DataMale, family = "binomial")
##
## AIC: 589.6
##
## Coefficients:
##           Estimate Std. Error z value Pr(>|z|)
## (Intercept)  -0.740      0.362  -2.04   0.041 *
## TreatmentExp   0.840      0.213   3.94 8.2e-05 ***
## HabitatWet     0.414      0.210   1.97   0.049 *
## ---
## Signif. codes:  0 '***' 0.001 '**' 0.01 '*' 0.05 '.' 0.1 ' ' 1
##
## Number of observations: total=480, Population=12, Container=60
```

```
## Random effect variance(s):
## Group=Population
##      Variance StdDev
## (Intercept)  1.111  1.054
## Group=Container
##      Variance StdDev
## (Intercept)  0.1857 0.4309
##
##
## Log-likelihood: -289.801
```

```
# Calculation of the variance in fitted values
VarF <- var(as.vector(model.matrix(morphmodADMBf) %*% fixef(morphmodADMBf)))

# getting the latent and link distribuiotn-specific varianc
VarDLa <- pi^2/3
VarDLi <- 1/(mean(DataMale$Colour) * (1 - mean(DataMale$Colour))) # the delta method
# comparing the two
c(VarDLa = VarDLa, VarDLi = VarDLi)
```

```
##      VarDLa      VarDLi
## 3.289868 4.005633
```

```
# Latent R2[GLMM(m)] - marginal R2[GLMM]
R2glmmM <- VarF/(VarF + sum(as.numeric(VarCorr(morphmodADMBf))) + VarDLa)
# R2[GLMM(c)] - conditional R2[GLMM] for full model
R2glmmC <- (VarF + sum(as.numeric(VarCorr(morphmodADMBf))))/(VarF + sum(as.numeric(VarCorr(morphmodADMBf))) + VarDLa)

# Raw unadjusted ICC[Population]
ICCrawPop <- VarCorr(morphmodADMBr)$Population[1]/(sum(as.numeric(VarCorr(morphmodADMBr))) + VarDLa)
# adjusted ICC[Population]
ICCadjPop <- VarCorr(morphmodADMBf)$Population[1]/(sum(as.numeric(VarCorr(morphmodADMBf))) + VarDLa)

# Raw unadjusted ICC[Container]
ICCrawCont <- VarCorr(morphmodADMBr)$Container[1]/(sum(as.numeric(VarCorr(morphmodADMBr))) + VarDLa)
# adjusted ICC[Container]
ICCadjCont <- VarCorr(morphmodADMBf)$Container[1]/(sum(as.numeric(VarCorr(morphmodADMBf))) + VarDLa)

# summarizing the results
Latent <- c(R2glmmM = R2glmmM, R2glmmC = R2glmmC, ICCrawPop = ICCrawPop, ICCadjPop = ICCadjPop,
            ICCrawCont = ICCrawCont, ICCadjCont = ICCadjCont)

# Link R2[GLMM(m)] - marginal R2[GLMM]
R2glmmM <- VarF/(VarF + sum(as.numeric(VarCorr(morphmodADMBf))) + VarDLi)
# R2[GLMM(c)] - conditional R2[GLMM] for full model
R2glmmC <- (VarF + sum(as.numeric(VarCorr(morphmodADMBf))))/(VarF + sum(as.numeric(VarCorr(morphmodADMBf))) + VarDLi)

# Raw unadjusted ICC[Population]
ICCrawPop <- VarCorr(morphmodADMBr)$Population[1]/(sum(as.numeric(VarCorr(morphmodADMBr))) + VarDLi)
# adjusted ICC[Population]
```

```

ICCrawPop <- VarCorr(morphmodADMBf)$Population[1]/(sum(as.numeric(VarCorr(morphmodADMBf))) +
  VarDLi)
# Raw unadjusted ICC[Container]
ICCrawCont <- VarCorr(morphmodADMBr)$Container[1]/(sum(as.numeric(VarCorr(morphmodADMBr))) +
  VarDLi)
# adjusted ICC[Container]
ICCadjCont <- VarCorr(morphmodADMBf)$Container[1]/(sum(as.numeric(VarCorr(morphmodADMBf))) +
  VarDLi)
# summarizing the results
Link <- c(R2glmmM = R2glmmM, R2glmmC = R2glmmC, ICCrawPop = ICCrawPop, ICCadjPop = ICCadjPop,
  ICCrawCont = ICCrawCont, ICCadjCont = ICCadjCont)
# comparing the results
rbind(Latent, Link)

```

```

##           R2glmmM  R2glmmC ICCrawPop ICCadjPop ICCrawCont ICCadjCont
## Latent 0.04570632 0.3155430 0.2263823 0.2422797 0.03063298 0.04048096
## Link   0.03978217 0.2746444 0.2095759 0.2422797 0.02637026 0.03501670

```

## (5.2) glmer morph models

```

# Fit null model without fixed effects (but including all random effects)
morphmodGLMERr <- glmer(Colour ~ 1 + (1 | Population) + (1 | Container), family = binomial(link = logit,
  data = DataMale)
# Fit alternative model including fixed and all random effects
morphmodGLMERf <- glmer(Colour ~ Treatment + Habitat + (1 | Population) + (1 |
  Container), family = binomial(link = logit), data = DataMale)
# View model fits for both models
summary(morphmodGLMERr)

```

```

## Generalized linear mixed model fit by maximum likelihood (Laplace
## Approximation) [glmerMod]
## Family: binomial ( logit )
## Formula: Colour ~ 1 + (1 | Population) + (1 | Container)
## Data: DataMale
##
##      AIC      BIC   logLik deviance df.resid
##    605.5    618.0   -299.8   599.5     477
##
## Scaled residuals:
##      Min       1Q   Median       3Q      Max
## -1.9949 -0.7198 -0.3566  0.6990  2.6388
##
## Random effects:
## Groups      Name      Variance Std.Dev.
## Container (Intercept) 0.1355   0.3681
## Population (Intercept) 1.0023   1.0012
## Number of obs: 480, groups: Container, 60; Population, 12
##
## Fixed effects:
##              Estimate Std. Error z value Pr(>|z|)
## (Intercept)  -0.1083     0.3107  -0.348   0.727

```



```
summary(morphmodGLMERf)
```

```
## Generalized linear mixed model fit by maximum likelihood (Laplace
## Approximation) [glmerMod]
## Family: binomial ( logit )
## Formula: Colour ~ Treatment + Habitat + (1 | Population) + (1 | Container)
## Data: DataMale
##
##      AIC      BIC   logLik deviance df.resid
##  589.6    610.5   -289.8   579.6     475
##
## Scaled residuals:
##      Min       1Q   Median       3Q      Max
## -2.3250 -0.7388 -0.3001  0.7524  3.7796
##
## Random effects:
## Groups      Name      Variance Std.Dev.
## Container (Intercept) 0.1855  0.4308
## Population (Intercept) 1.1108  1.0540
## Number of obs: 480, groups: Container, 60; Population, 12
##
## Fixed effects:
##              Estimate Std. Error z value Pr(>|z|)
## (Intercept)   -0.7399    0.3614  -2.047  0.0406 *
## TreatmentExp    0.8394    0.2117   3.966 7.31e-05 ***
## HabitatWet     0.4137    0.2087   1.982  0.0475 *
## ---
## Signif. codes:  0 '***' 0.001 '**' 0.01 '*' 0.05 '.' 0.1 ' ' 1
##
## Correlation of Fixed Effects:
##              (Intr) TrtmnE
## TreatmntExp -0.310
## HabitatWet  -0.303  0.041
```

```
# Calculation of the variance in fitted values
```

```
VarF <- var(as.vector(model.matrix(morphmodGLMERf) %>% fixef(morphmodGLMERf)))
```

```
# getting the latent and link distribuiotn-specific varianc
```

```
VarDLa <- pi^2/3
```

```
VarDLi <- 1/(mean(DataMale$Colour) * (1 - mean(DataMale$Colour))) # the delta method
```

```
# comparing the two
```

```
c(VarDLa = VarDLa, VarDLi = VarDLi)
```

```
## VarDLa VarDLi
```

```
## 3.289868 4.005633
```

```
# Latent R2[GLMM(m)] - marginal R2[GLMM]
```

```
R2glmmM <- VarF/(VarF + sum(as.numeric(VarCorr(morphmodGLMERf))) + VarDLa)
```

```
# R2[GLMM(c)] - conditional R2[GLMM] for full model
```

```
R2glmmC <- (VarF + sum(as.numeric(VarCorr(morphmodGLMERf))))/(VarF + sum(as.numeric(VarCorr(morphmodGLMERf))) + VarDLa)
```

```
# Raw unadjusted ICC[Population]
```

```

ICCrawPop <- as.numeric(VarCorr(morphmodGLMERr)$Population)/(sum(as.numeric(VarCorr(morphmodGLMERr))) +
  VarDLa)
# adjusted ICC[Population]
ICCadjPop <- as.numeric(VarCorr(morphmodGLMERf)$Population)/(sum(as.numeric(VarCorr(morphmodGLMERf))) +
  VarDLa)
# Raw unadjusted ICC[Container]
ICCrawCont <- as.numeric(VarCorr(morphmodGLMERr)$Container)/(sum(as.numeric(VarCorr(morphmodGLMERr))) +
  VarDLa)
# adjusted ICC[Container]
ICCadjCont <- as.numeric(VarCorr(morphmodGLMERf)$Container)/(sum(as.numeric(VarCorr(morphmodGLMERf))) +
  VarDLa)
# summarizing the results
Latent <- c(R2glmmM = R2glmmM, R2glmmC = R2glmmC, ICCrawPop = ICCrawPop, ICCadjPop = ICCadjPop,
  ICCrawCont = ICCrawCont, ICCadjCont = ICCadjCont)

# Link R2[GLMM(m)] - marginal R2[GLMM]
R2glmmM <- VarF/(VarF + sum(as.numeric(VarCorr(morphmodGLMERf)))) + VarDLi)
# R2[GLMM(c)] - conditional R2[GLMM] for full model
R2glmmC <- (VarF + sum(as.numeric(VarCorr(morphmodGLMERf))))/(VarF + sum(as.numeric(VarCorr(morphmodGLMERf))) +
  VarDLi)
# Raw unadjusted ICC[Population]
ICCrawPop <- as.numeric(VarCorr(morphmodGLMERr)$Population)/(sum(as.numeric(VarCorr(morphmodGLMERr))) +
  VarDLi)
# adjusted ICC[Population]
ICCadjPop <- as.numeric(VarCorr(morphmodGLMERf)$Population)/(sum(as.numeric(VarCorr(morphmodGLMERf))) +
  VarDLi)
# Raw unadjusted ICC[Container]
ICCrawCont <- as.numeric(VarCorr(morphmodGLMERr)$Container)/(sum(as.numeric(VarCorr(morphmodGLMERr))) +
  VarDLi)
# adjusted ICC[Container]
ICCadjCont <- as.numeric(VarCorr(morphmodGLMERf)$Container)/(sum(as.numeric(VarCorr(morphmodGLMERf))) +
  VarDLi)
# summarizing the results
Link <- c(R2glmmM = R2glmmM, R2glmmC = R2glmmC, ICCrawPop = ICCrawPop, ICCadjPop = ICCadjPop,
  ICCrawCont = ICCrawCont, ICCadjCont = ICCadjCont)
# comparing the results
rbind(Latent, Link)

```

```

##           R2glmmM  R2glmmC ICCrawPop ICCadjPop ICCrawCont ICCadjCont
## Latent 0.04565558 0.3154186 0.2263791 0.2422109 0.03059611 0.04045751
## Link   0.03973706 0.2745296 0.1948760 0.2095128 0.02633833 0.03499581

```

## (6) *Extra* parasite models: Tweedie (Compound Poisson) GLMMs with log link

$R^2_{\text{GLMM}}$  and  $\text{ICC}_{\text{GLMM}}$  obtained from the `cpglmm` models were very similar to those from the `glmmabmb` models and the `glmer.nb` models above.

```
library(cplm)
```

## (6.1) cpplmm parasite models

```
# Fit null model without fixed effects (but including all random effects)
parmodCPr <- cpplmm(Parasite ~ 1 + (1 | Population) + (1 | Container), data = DataAll)
# Fit alternative model including fixed and all random effects
parmodCPf <- cpplmm(Parasite ~ Sex + Treatment + Habitat + (1 | Population) +
  (1 | Container), data = DataAll)
# View model fits for both models
summary(parmodCPr)
```

```
## Compound Poisson linear mixed model fit by the Laplace approximation
## Formula: Parasite ~ 1 + (1 | Population) + (1 | Container)
## Data: DataAll
## AIC BIC logLik deviance
## 4560 4579 -2276 4552
## Random effects:
## Groups Name Variance Std.Dev.
## Container (Intercept) 1.93071 1.38950
## Population (Intercept) 0.37748 0.61439
## Residual 2.28393 1.51127
## Number of obs: 960, groups: Container, 120; Population, 12
##
## Fixed effects:
## Estimate Std. Error t value
## (Intercept) 0.7572 0.2223 3.406
##
## Estimated dispersion parameter: 2.2839
## Estimated index parameter: 1.213
```

```
summary(parmodCPf)
```

```
## Compound Poisson linear mixed model fit by the Laplace approximation
## Formula: Parasite ~ Sex + Treatment + Habitat + (1 | Population) + (1 | Container)
## Data: DataAll
## AIC BIC logLik deviance
## 4045 4079 -2015 4031
## Random effects:
## Groups Name Variance Std.Dev.
## Container (Intercept) 0.60049 0.77492
## Population (Intercept) 0.54027 0.73503
## Residual 1.70038 1.30399
## Number of obs: 960, groups: Container, 120; Population, 12
##
## Fixed effects:
## Estimate Std. Error t value
## (Intercept) 1.72071 0.23916 7.195
## SexMale -2.21471 0.16144 -13.719
## TreatmentExp -0.76009 0.04432 -17.150
## HabitatWet 0.74759 0.04426 16.892
##
## Estimated dispersion parameter: 1.7004
## Estimated index parameter: 1.213
```

```

# Calculation of the variance in fitted values
VarF <- var(as.vector(model.matrix(parmodCPf) %*% fixef(parmodCPf)))

# getting the observation-level variance Null model
phiN <- parmodCPr@phi # the dispersion parameter
pN <- parmodCPr@p # the index parameter
mu <- mean(DataAll$Parasite) # the mean on the data scale
VarOdN <- phiN * mu^(pN - 2) # the delta method
VarOlN <- log(1 + (phiN * mu^(pN - 2))) # log-normal approximation

# comparing the three
c(VarOdN = VarOdN, VarOlN = VarOlN)

```

```

##      VarOdN      VarOlN
## 0.4562733 0.3758806

```

```

# Full model
phiF <- parmodCPf@phi # the dispersion parameter
pF <- parmodCPf@p # the index parameter
VarOdF <- phiF * mu^(pF - 2) # the delta method
VarOlF <- log(1 + (phiF * mu^(pF - 2))) # log-normal approximation
# comparing the three
c(VarOdF = VarOdF, VarOlF = VarOlF)

```

```

##      VarOdF      VarOlF
## 0.3396947 0.2924418

```

```

# R2[GLMM(m)] - marginal R2[GLMM]; using the delta method observation-level
# variance
R2glmmM <- VarF/(VarF + sum(as.numeric(VarCorr(parmodCPf))) + VarOdF)
# R2[GLMM(c)] - conditional R2[GLMM] for full model
R2glmmC <- (VarF + sum(as.numeric(VarCorr(parmodCPf))))/(VarF + sum(as.numeric(VarCorr(parmodCPf))) +
  VarOdF)
# Raw unadjusted ICC[Population]
ICCrawPop <- VarCorr(parmodCPr)$Population[1]/(sum(as.numeric(VarCorr(parmodCPr))) +
  VarOdN)
# adjusted ICC[Population]
ICCadPop <- VarCorr(parmodCPf)$Population[1]/(sum(as.numeric(VarCorr(parmodCPf))) +
  VarOdF)
# Raw unadjusted ICC[Container]
ICCrawCont <- VarCorr(parmodCPr)$Container[1]/(sum(as.numeric(VarCorr(parmodCPr))) +
  VarOdN)
# adjusted ICC[Container]
ICCadCont <- VarCorr(parmodCPf)$Container[1]/(sum(as.numeric(VarCorr(parmodCPf))) +
  VarOdF)
# comparing the results
c(R2glmmM = R2glmmM, R2glmmC = R2glmmC, ICCrawPop = ICCrawPop, ICCadPop = ICCadPop,
  ICCrawCont = ICCrawCont, ICCadCont = ICCadCont)

```

```

##      R2glmmM      R2glmmC      ICCrawPop      ICCadPop      ICCrawCont      ICCadCont
## 0.5052650 0.8864818 0.1365460 0.3649328 0.6984041 0.4056146

```

## **This is the end (Thank you)**

Please contact us (Shinichi Nakagawa; [s.nakagawa@unsw.edu.au](mailto:s.nakagawa@unsw.edu.au) or Holger Schielzeth; [holger.schielzeth@uni-jena.de](mailto:holger.schielzeth@uni-jena.de)) if you find mistakes and bugs.
